# Supplementary material for: Nitrogen-free commercial carbon cloth with rich defects for electrocatalytic ammonia synthesis under ambient conditions
Source: Royal Society of Chemistry journal article supplement (doi:10.1039/c8cc06000b), 2018-01-01
Supplement: c8cc06000b1.pdf [file c8cc06000b1.pdf]

## Electronic Supplementary Information

### Nitrogen-free commercial carbon cloth with rich defects for electrocatalytic ammonia synthesis under ambient conditions

Wenyi Li,<sup>ab</sup> Tianxing Wu,<sup>a</sup> Shengbo Zhang,<sup>ab</sup> Yanyan Liu,<sup>ab</sup> Cuijiao Zhao,<sup>ab</sup> Guoqiang Liu,<sup>ab</sup> Guozhong Wang,<sup>b</sup> Haimin Zhang,<sup>\*a</sup> and Huijun Zhao<sup>ac</sup>

---

<sup>a.</sup> Key Laboratory of Materials Physics, Centre for Environmental and Energy Nanomaterials, Anhui Key Laboratory of Nanomaterials and Nanotechnology, CAS Center for Excellence in Nanoscience, Institute of Solid State Physics, Chinese Academy of Sciences, Hefei 230031, China. E-mail: zhanghm@issp.ac.cn

<sup>b.</sup> University of Science and Technology of China, Hefei 230026, China.

<sup>c.</sup> Centre for Clean Environment and Energy, Griffith University, Gold Coast Campus, QLD 4222, Australia.

### Experimental section

**Preparation of CC-X samples.** All of the chemical reagents were analytical grade (AR) and were used without further purification. The commercial carbon cloth (CC, HCP330) was purchased from Shanghai HESEN company, which was composed of the interwoven carbon fibers and fabricated at high temperature (1500~1800 °C) in Ar atmosphere. Firstly, the commercial carbon cloth (CC) was rinsed adequately with ethanol and water for several times, then thermally treated at different temperatures (250, 350 and 450 °C) in a muffle under air atmosphere for 2 h with a heating rate of 5 °C min<sup>-1</sup>. After that, the as-fabricated CC samples were collected and denoted as CC-X, in where X represents the temperature of 250, 350 and 450 °C, respectively.

**Characterization.** The crystalline phase and structure of the obtained samples were characterized by X-ray diffraction (XRD, X'Pert Pro Super, Philips Co., the Netherlands) with Cu K $\alpha$  radiation (1.5478 Å). The morphology and precise structure of the samples were characterized by field emission scanning electron

microscopy (FESEM, Quanta 200FEG) and transmission electron microscopy (TEM, JEOL 2010) with an energy dispersive X-ray spectrometer (EDS Oxford, Link ISIS). X-ray photoelectron spectroscopy (XPS) analysis of the samples was performed on an ESCALAB 250(Thermo, America) equipped with Al  $K\alpha_{1,2}$  monochromatized radiation at 1486.6 eV X-ray source. Raman spectra of the samples were recorded on a Renishaw inVia Raman microspectrometer.  $N_2$  adsorption–desorption isotherms of the samples were carried out on Autosorb-iQ-Cx (Quantachrome, United States). Temperature-programmed desorption ( $N_2$ -TPD) of  $N_2$  experiments were conducted on a Quantachrome ChemBET Pulsar TPR/TPD. Thermogravimetric analysis (TGA) was carried out on a Perkin-Elmer apparatus (Pyris 1) at a heating rate of  $5\text{ }^\circ\text{C min}^{-1}$  from room temperature to  $700\text{ }^\circ\text{C}$  in a flowing air.

**Electrochemical measurements.** All electrochemical measurements were performed on a CHI 760E electrochemical workstation (CH Instrumental Corporation, Shanghai, China). All experiments were performed in a sealed single-compartment reactor with a configuration composed of the thermally treated carbon cloth (CC,  $1\times 1\text{ cm}^2$ ) working electrode, Ag/AgCl reference electrode and pristine CC ( $1\times 1\text{ cm}^2$ ) counter electrode. The polarization curves were measured with a scan rate of  $5.0\text{ mV s}^{-1}$  at room temperature and all polarization curves were obtained at the steady-state ones after several cycles. The electrochemical impedance spectroscopy (EIS) measurements were performed by applying an AC voltage with 10 mV amplitude in a frequency range from 100,000 to 1 Hz and recorded at  $-0.3\text{ V}$  (vs. RHE). For  $N_2$  reduction reaction (NRR) experiments, the potentiostatic test was conducted for 1 h

under the  $N_2$ -saturated 0.1 M  $Na_2SO_4$ +0.02 M  $H_2SO_4$  solution (20 mL) by continuously supplying  $N_2$  into the electrolyte under ambient conditions.

**Determination of ammonia.** Concentration of the produced ammonia was spectrophotometrically detected by the indophenol blue method. In detail, 5 mL of sample was taken, and then diluted with 5 mL of deionized water. Subsequently, 100  $\mu$ L of oxidizing solution (sodium hypochlorite ( $pCl=4\sim 4.9$ ) and 0.75 M sodium hydroxide), 500  $\mu$ L of colouring solution (0.4 M sodium salicylate and 0.32 M sodium hydroxide) and 100  $\mu$ L of catalyst solution (0.1g  $Na_2[Fe(CN)_5NO]\cdot 2H_2O$  diluted to 10 mL with deionized water) were added respectively to the measured sample solution. After the placement of 1 h in room temperature, the absorbance measurements were performed at wavelength of 697 nm. The obtained calibration curve (Fig. S4) was used to calculate the ammonia concentration.

**Determination of hydrazine.** The hydrazine present in the electrolyte was estimated by the method of Watt and Chrisp. A mixture of para-(dimethylamino) benzaldehyde (5.99 g), HCl (concentrated, 30 mL) and ethanol (300 mL) was used as a color reagent. In detail, 5 mL of sample with 0.1 M HCl solution was taken, and then 5 mL of the prepared color reagent was added to the above sample solution. Subsequently, the absorbance measurements were performed after the placement of 20 min at wavelength of 455 nm. The obtained calibration curve (Fig. S5) was used to calculate the  $N_2H_4\cdot H_2O$  concentration.

#### **Calculations of $NH_3$ production rate and Faradaic efficiency.**

The equation of  $NH_3$  production rate:

$$R(\text{NH}_3)(\text{mol cm}^{-2} \text{ s}^{-1}) = \frac{\chi(\text{ppm}) \times 10^{-3} (\text{g mg}^{-1}) \times V(\text{L})}{M_{\text{r}_{\text{NH}_4^+-\text{N}}} (\text{g mol}^{-1}) \times t(\text{s}) \times S(\text{cm}^{-2})}$$

where  $R(\text{NH}_3)$  is the ammonia production rate in  $\text{mol cm}^{-2} \text{ s}^{-1}$ ;  $\chi$  (ppm) is the produced ammonia concentration;  $V$  (L) is the electrolyte solution volume;  $M_{\text{r}_{\text{NH}_4^+-\text{N}}}$  = 14 ( $\text{g mol}^{-1}$ );  $t$  (s) is the reaction time;  $S$  is the geometric area of the cathodic electrode in  $\text{cm}^2$ , and in this work two sides of the carbon cloth electrode are electrocatalytically active for the NRR, thus the  $\text{NH}_3$  production rate is calculated by dividing the total geometric area of two sides of the carbon cloth electrode.

The equation of Faradaic efficiency:

$$FE(\text{NH}_3)(\%) = \frac{3 \times R(\text{NH}_3)(\text{mol cm}^{-2} \text{ s}^{-1}) \times S(\text{cm}^{-2}) \times F}{Q} \times 100\%$$

where  $F$  is the Faradaic constant (96485.34);  $Q$  is the total charge during the NRR.

## Supplementary Tables and Figures

**Table S1.** Elemental composition analysis of the pristine CC and CC-X samples by XPS technique.

| Sample      | C (at.%) | O (at.%) |
|-------------|----------|----------|
| Pristine CC | 98.49    | 1.51     |
| CC-250      | 98.67    | 1.33     |
| CC-350      | 97.77    | 2.23     |
| CC-450      | 98.99    | 1.01     |

**Table S2.** The comparable results of our work and other recently reported carbon-based NRR electrocatalysts.

| References                            | Catalyst                             | System /Conditions                                                                | NH <sub>3</sub> Production Rate                                                                                                                                                                  | Faradaic Efficiency (%) | Detection method         |
|---------------------------------------|--------------------------------------|-----------------------------------------------------------------------------------|--------------------------------------------------------------------------------------------------------------------------------------------------------------------------------------------------|-------------------------|--------------------------|
| Angew. Chem. Int. Ed. 2017, 56, 2699. | Fe <sub>2</sub> O <sub>3</sub> -CNTs | KHCO <sub>3</sub>                                                                 | 2.2×10 <sup>-3</sup> g <sub>NH<sub>3</sub></sub> m <sup>-2</sup> h <sup>-1</sup><br>(-2.0V vs. Ag/AgCl)                                                                                          | 0.15                    | Indophenol method        |
| Adv. Mater. 2017, 29, 1604799.        | Au nanorods                          | 0.1 M KOH                                                                         | 1.648 g h <sup>-1</sup> cm <sup>-2</sup><br>(-0.2 V vs. RHE)                                                                                                                                     | 3.87                    | Nessler's reagent        |
| ACS Catal. 2018, 8, 1186.             | N doped porous carbon                | 0.05 M H <sub>2</sub> SO <sub>4</sub>                                             | 1.40 mmol g <sup>-1</sup> h <sup>-1</sup><br>(-0.9 V vs. RHE)                                                                                                                                    | 1.5                     | Nessler's reagent        |
| Nano Energy 2018, 48, 217.            | ZIF-derived carbon                   | 0.1 M KOH                                                                         | 3.4×10 <sup>-6</sup> mol cm <sup>-2</sup> h <sup>-1</sup><br>(-0.3V vs. RHE)                                                                                                                     | 10.2                    | Indophenol method        |
| Nat. Commun. 2018, 9, 1795.           | Pd/C                                 | 0.1 M PBS                                                                         | 4.5 μg mg <sup>-1</sup> <sub>Pd</sub> h <sup>-1</sup><br>(0.1V vs. RHE)                                                                                                                          | 8.2                     | Indophenol method        |
| Adv. Mater. 2018, 1800191.            | MoS <sub>2</sub> /CC                 | 0.1 M Na <sub>2</sub> SO <sub>4</sub>                                             | 8.08×10 <sup>-11</sup> mol s <sup>-1</sup> cm <sup>-1</sup><br>(-0.2 V vs. RHE)                                                                                                                  | 1.17                    | Indophenol method        |
| Sci. Adv. 2018, 4: e1700336.          | N doped carbon nanospikes            | 0.25 M LiClO <sub>4</sub>                                                         | 97.18 ± 7.13 mg h <sup>-1</sup> cm <sup>-2</sup><br>(-1.19 V vs. RHE)                                                                                                                            | 11.56 ± 0.85            | Indophenol method        |
| Chem. Commun. 2018, 54, 5323.         | VN/CC                                | 0.1 M HCl                                                                         | 2.48×10 <sup>-10</sup> mol s <sup>-1</sup> cm <sup>-1</sup><br>(-0.3 V vs. RHE)                                                                                                                  | 3.58                    | Indophenol method        |
| J. Mater. Chem. A 2018, 6, 7762.      | N doped porous carbon                | 0.1 M HCl                                                                         | 15.7 μg h <sup>-1</sup> mg <sup>-1</sup><br>(-0.3 V vs. RHE)                                                                                                                                     | 1.45                    | Indophenol method        |
| Angew. Chem. Int. Ed. 2018, 57, 1.    | N doped porous carbon                | 1.0 M HCl                                                                         | 0.08 g h <sup>-1</sup> m <sup>-2</sup><br>(-0.3 V vs. RHE)                                                                                                                                       | 5.2                     | Indophenol method        |
| ACS Energy Lett. 2018, 3, 1219.       | α-Fe@Fe <sub>3</sub> O <sub>4</sub>  | [C <sub>4</sub> mpyr][eFAP]-FPEE mix                                              | 2.35 × 10 <sup>-11</sup> mol s <sup>-1</sup> cm <sup>-2</sup><br>(-0.6 V vs. NHE)                                                                                                                | 32                      | Indophenol method        |
| Energy Environ. Sci. 2017, 10, 2516.  | Fe electrode/FTO                     | [P <sub>6,6,6,14</sub> ][eFAP]                                                    | 14 mg h <sup>-1</sup> m <sup>-2</sup><br>(-0.8 V vs. NHE)                                                                                                                                        | 60                      | Indophenol method        |
| <b>This work</b>                      | <b>CC-450</b>                        | <b>0.1 M Na<sub>2</sub>SO<sub>4</sub>+<br/>0.02 M H<sub>2</sub>SO<sub>4</sub></b> | <b>2.59×10<sup>-10</sup> mol s<sup>-1</sup> cm<sup>-1</sup><br/>or 9.3×10<sup>-7</sup> mol cm<sup>-2</sup> h<sup>-1</sup><br/>or 15.8 μg cm<sup>-1</sup> h<sup>-1</sup><br/>(-0.3 V vs. RHE)</b> | <b>6.92</b>             | <b>Indophenol method</b> |

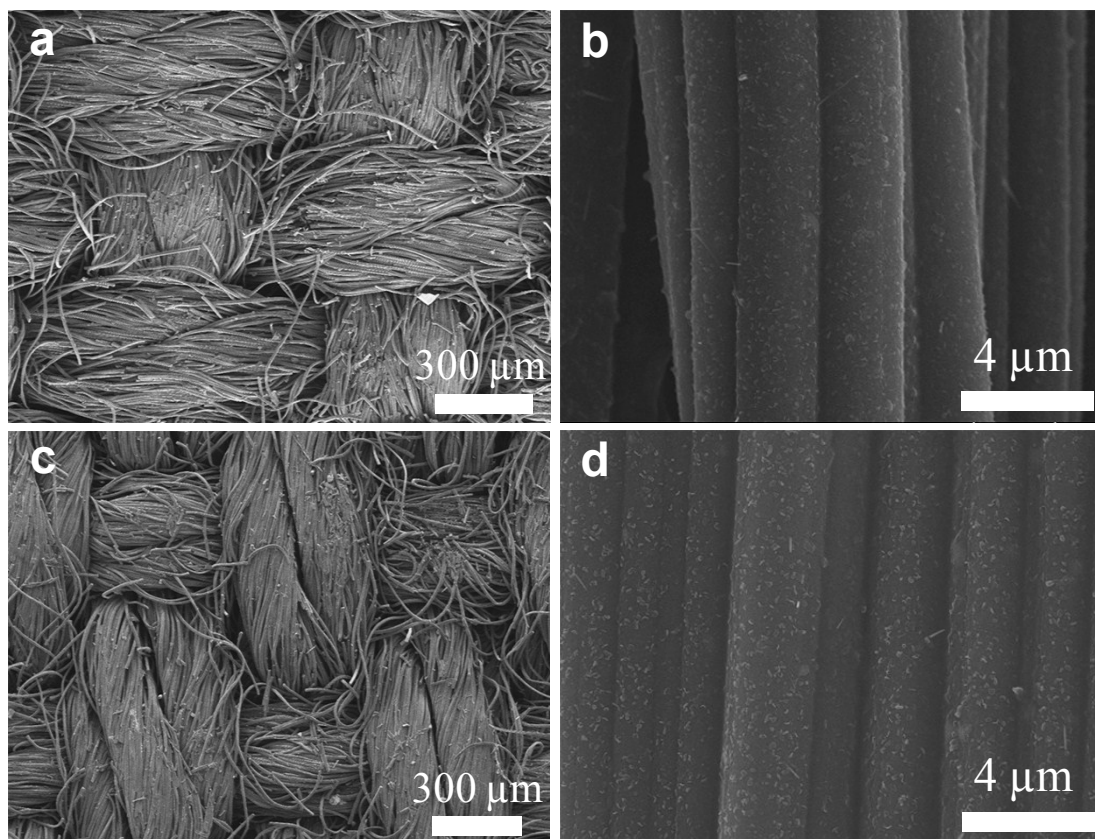

**Fig. S1** Low- and high-magnification SEM images of (a), (b) the pristine CC and (c), (d) the thermally treated CC-450.

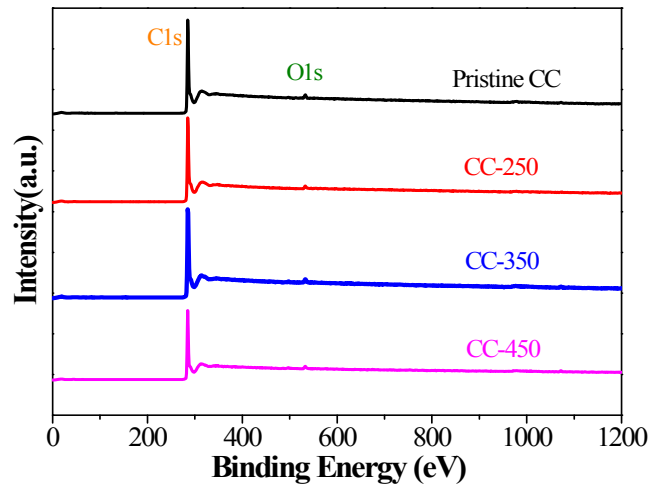

**Fig. S2** The surface survey XPS spectra of the pristine CC and CC-X samples.

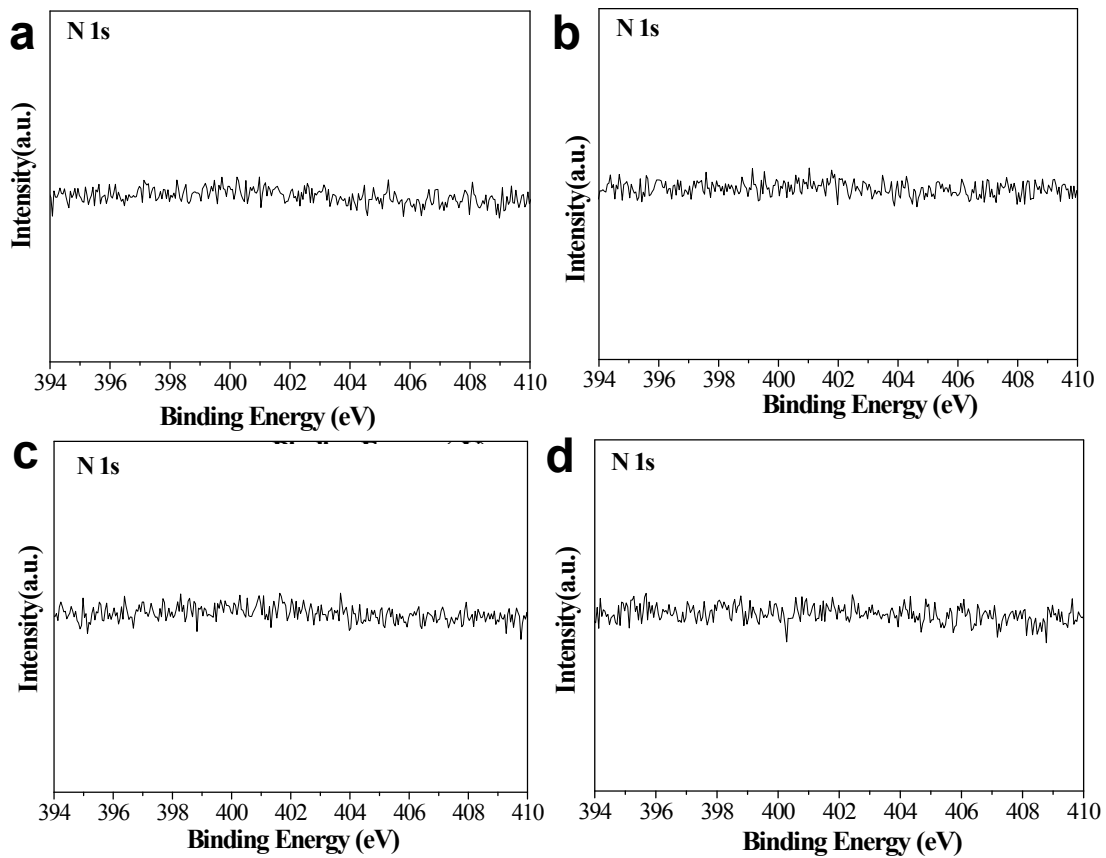

**Fig. S3** The high-resolution N 1s XPS spectra of (a) the pristine CC; (b) CC-250; (c) CC-350; (d) CC-450 samples before the NRR.

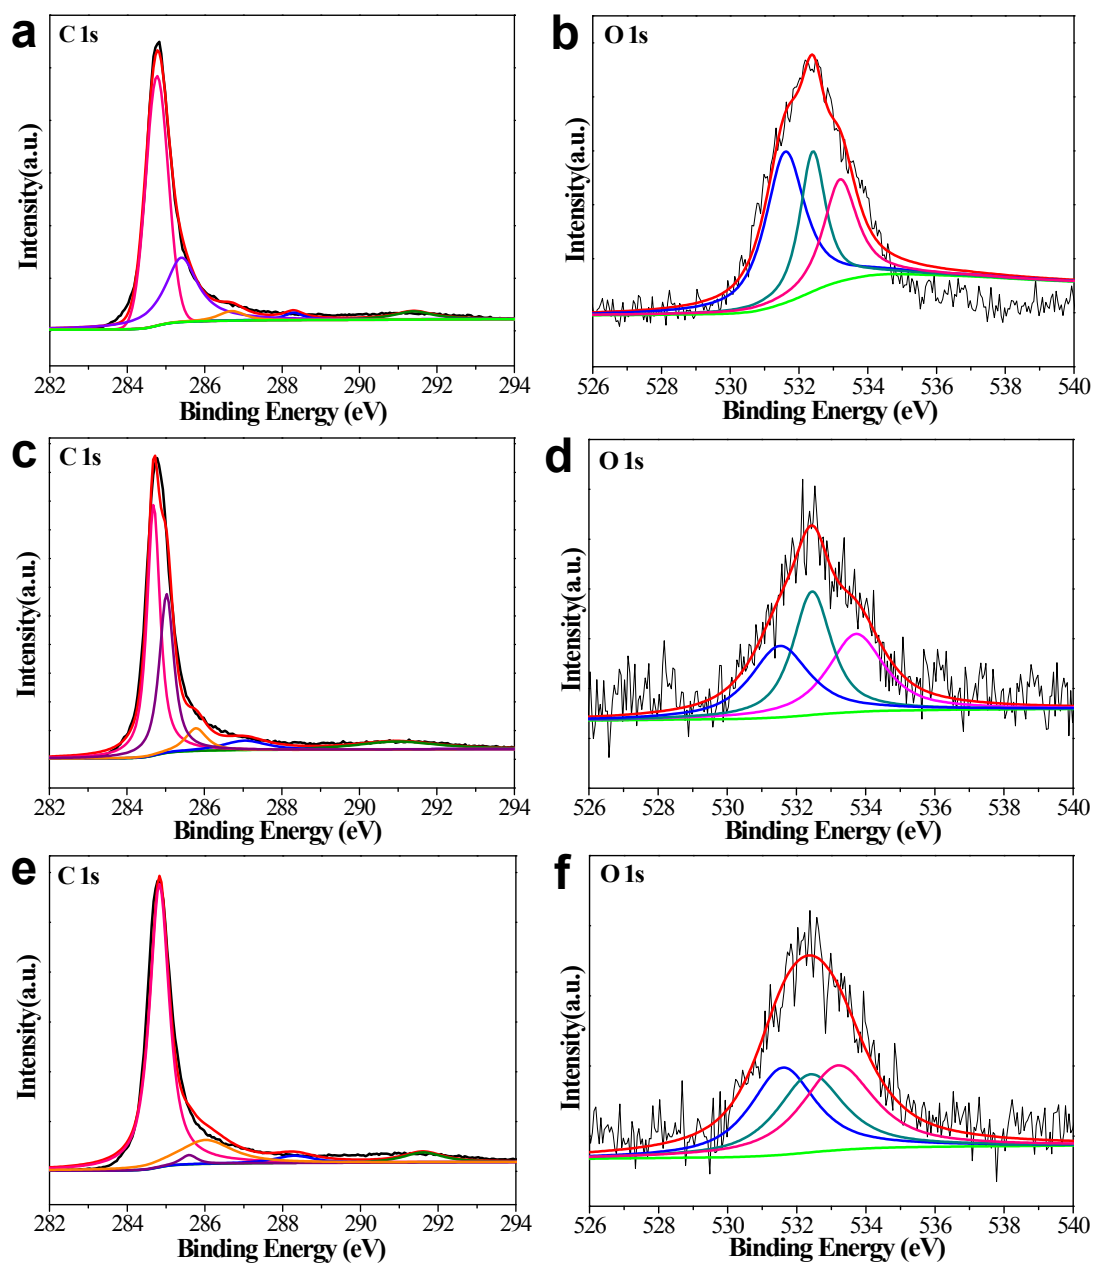

**Fig. S4** The high-resolution C 1s and O 1s XPS spectra of (a),(b) pristine CC; (c), (d) CC-250; (e), (f) CC-350.



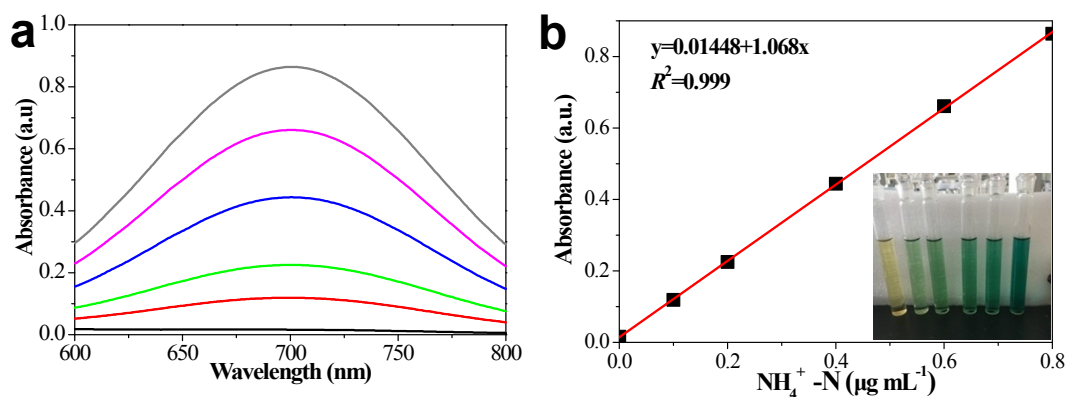

**Fig. S5** (a) UV-Vis absorption spectra of various  $\text{NH}_4^+\text{-N}$  concentrations (0, 0.1, 0.2, 0.4, 0.6 and 0.8  $\mu\text{g mL}^{-1}$ ) after incubated for 1 h at room temperature. (b) The calibration curve used for calculation of  $\text{NH}_4^+\text{-N}$  concentration; the inset in (b) of the corresponding photographs of different concentrations of  $\text{NH}_4^+\text{-N}$  solutions.

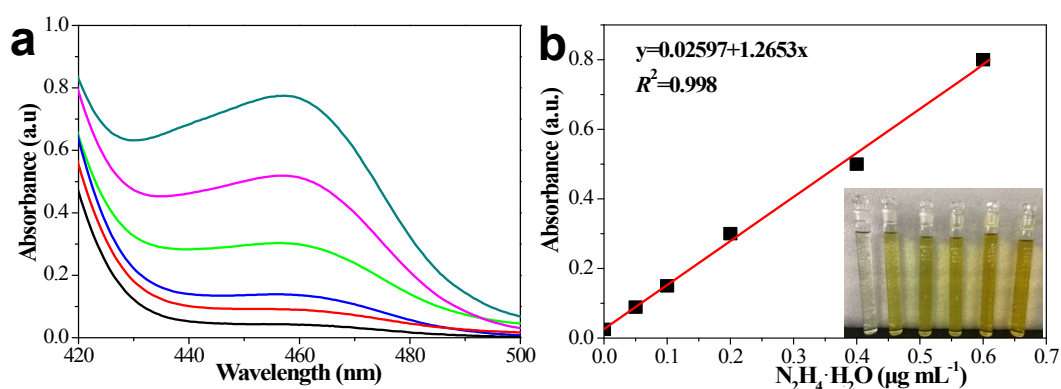

**Fig. S6** (a) UV-Vis absorption spectra of various  $\text{N}_2\text{H}_4\cdot\text{H}_2\text{O}$  concentrations (0, 0.5, 1, 2, 4 and 6  $\mu\text{g mL}^{-1}$ ) after incubated for 20 min at room temperature. (b) The calibration curve used for calculation of  $\text{N}_2\text{H}_4\cdot\text{H}_2\text{O}$  concentrations. The inset in (b) of the corresponding photographs of different concentrations of  $\text{N}_2\text{H}_4\cdot\text{H}_2\text{O}$  solutions.

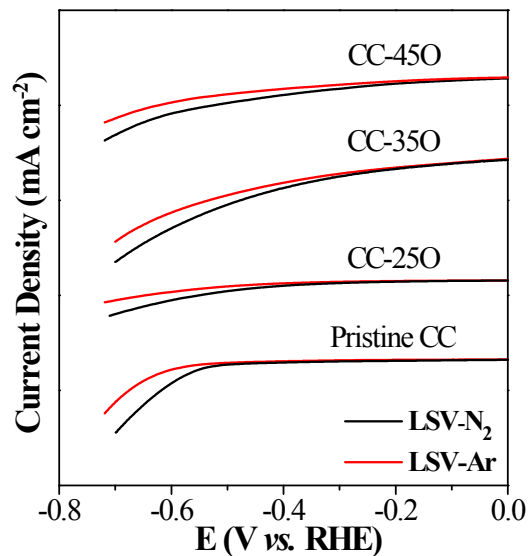

**Fig. S7** Linear sweep voltammogram (LSV) curves of the pristine CC and thermally treated CC electrocatalysts in Ar- or N<sub>2</sub>-saturated 0.1 M Na<sub>2</sub>SO<sub>4</sub>+0.02 M H<sub>2</sub>SO<sub>4</sub> electrolyte with a scan rate of 5.0 mV s<sup>-1</sup>.

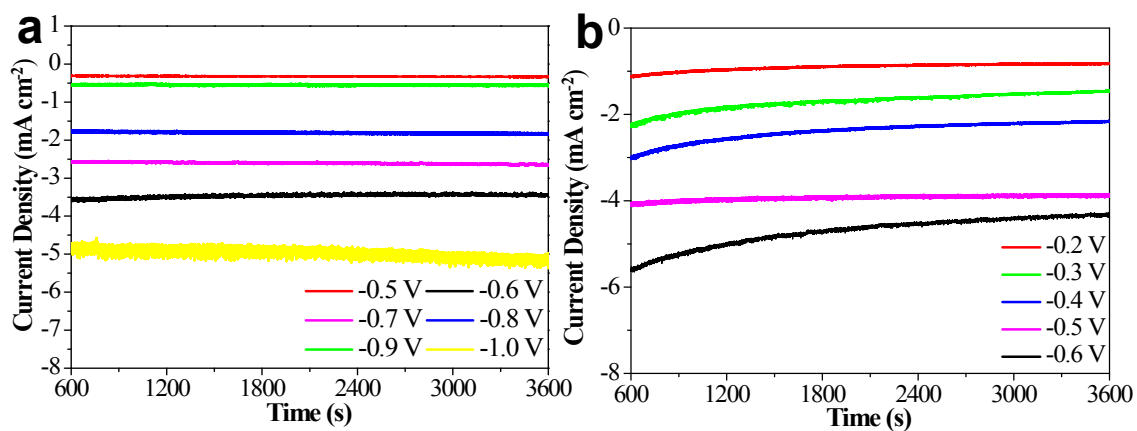

**Fig. S8** Time-dependent current density curves of (a) pristine CC and (b) CC-450 for the NRR at different potentials in 0.1 M Na<sub>2</sub>SO<sub>4</sub>+0.02 M H<sub>2</sub>SO<sub>4</sub> electrolyte.

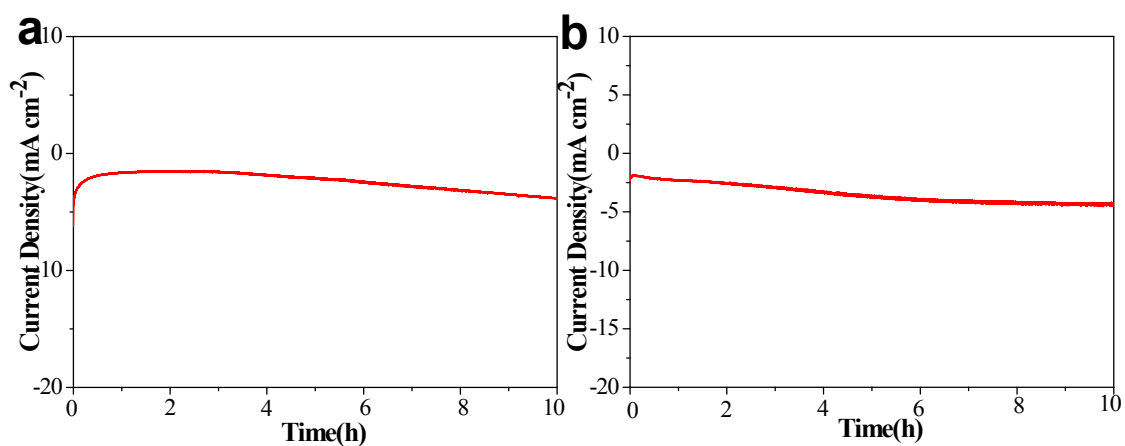

**Fig. S9** The current density-time curves of the CC-450 at -0.3 V (vs. RHE) in  $N_2$ -saturated 0.1 M  $Na_2SO_4$ +0.02 M  $H_2SO_4$  electrolyte for two times 10 h of NRR measurements. (a) First durability test; (b) Second durability test.

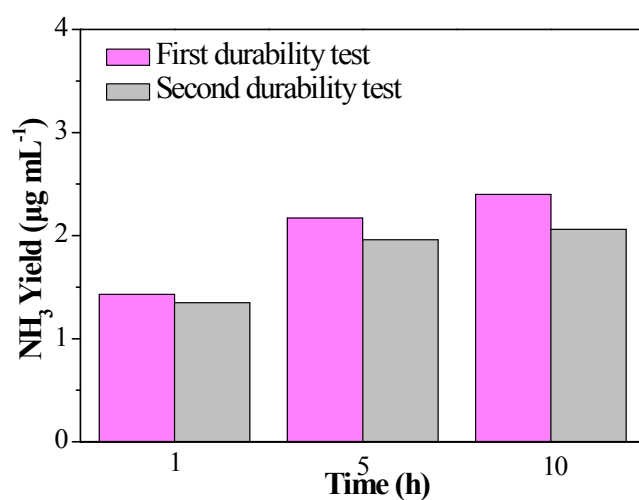

**Fig. S10** The  $NH_3$  yield obtained at -0.3 V (vs. RHE) in  $N_2$ -saturated 0.1 M  $Na_2SO_4$ +0.02 M  $H_2SO_4$  electrolyte for two times 10 h of NRR measurements.

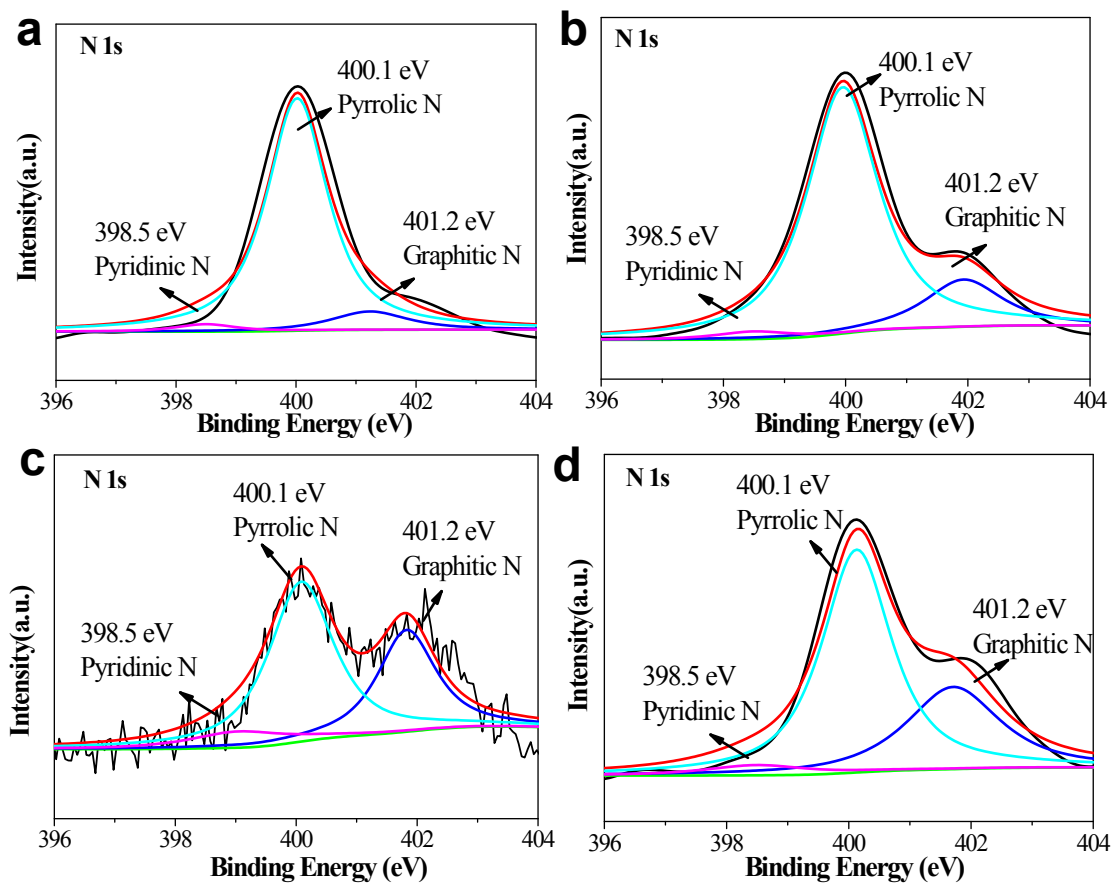

**Fig. S11** The high-resolution N 1s XPS spectra of (a) pristine CC; (b) CC-250; (c) CC-350; (d) CC-450 samples after the NRR for 10 h of reaction.

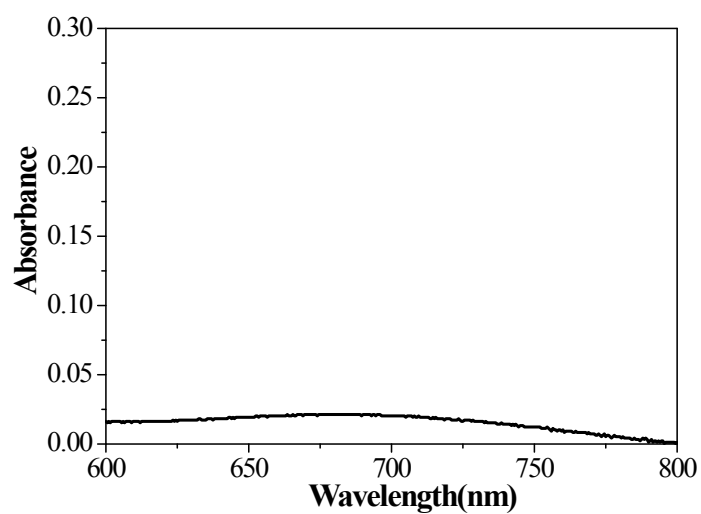

**Fig. S12** UV-Vis spectra of  $\text{N}_2$ -saturated 0.1 M  $\text{Na}_2\text{SO}_4$ +0.02 M  $\text{H}_2\text{SO}_4$  electrolyte (blank electrolyte) for a placement time of 2 h.

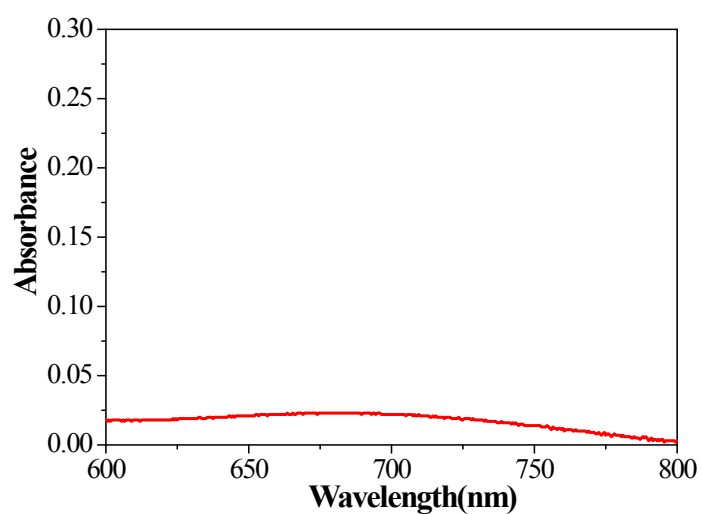

**Fig. S13** UV-Vis spectra of  $\text{N}_2$ -saturated 0.1 M  $\text{Na}_2\text{SO}_4$ +0.02 M  $\text{H}_2\text{SO}_4$  electrolyte under the open-circuit condition using the CC-450 for a placement time of 2 h.

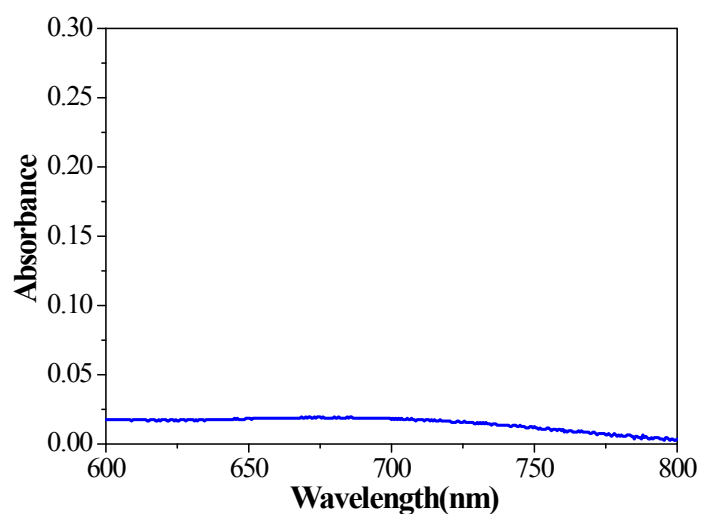

**Fig. S14** UV-Vis spectra of Ar-saturated 0.1 M Na<sub>2</sub>SO<sub>4</sub>+0.02 M H<sub>2</sub>SO<sub>4</sub> electrolyte at -0.3 V (vs. RHE) using the CC-450 for a reaction time of 2 h.

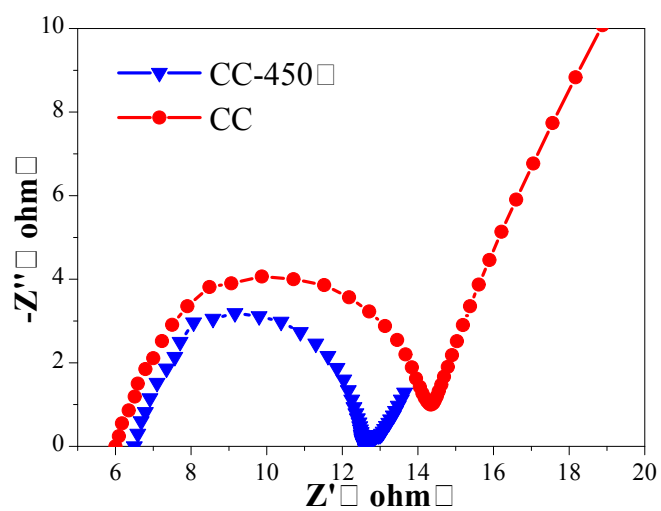

**Fig. S15** The electrochemical impedance spectroscopy (EIS) analysis of pristine CC and CC-450 at -0.3 V (vs. RHE) in N<sub>2</sub>-saturated 0.1 M Na<sub>2</sub>SO<sub>4</sub>+0.02 M H<sub>2</sub>SO<sub>4</sub> electrolyte.

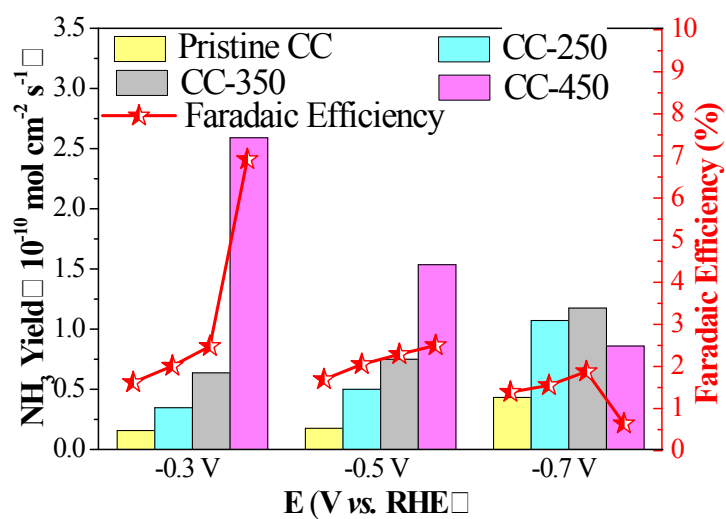

**Fig. S16** The  $\text{NH}_3$  yield and Faradaic efficiency of pristine CC, CC-250, CC-350 and CC-450 at -0.3, -0.5 and 0.7 V (vs. RHE) in  $\text{N}_2$ -saturated 0.1 M  $\text{Na}_2\text{SO}_4$ +0.02 M  $\text{H}_2\text{SO}_4$  electrolyte for 1 h of reaction.
